# Supplementary material
Source: publisher figshare collection journal article supplement (https://tandf.figshare.com/articles/dataset/_/1569468)
Supplement: Supplementary file 1 [file 1]

**VIDEO 1.** Anterior synechiolysis with a healon cannula and Viscoat® ophthalmic viscosurgical devices (OVDs) through anterior lamellar dissection in penetrating keratoplasty. Total anterior synechiolysis was done at 360 degrees with a closed anterior chamber state using a healon cannula and OVDs. (Video accessible in digital version of article).
